# Supplementary material
Source: Springer Nature journal article supplement (https://www.springermedizin.de/resource/supplementary/12916_2014_987_MOESM7_ESM.pdf/9598962)

**Supplemental Figure 6. PFS as extracted from Kaplan Meier curves for individual randomized controlled trials included by treatment**

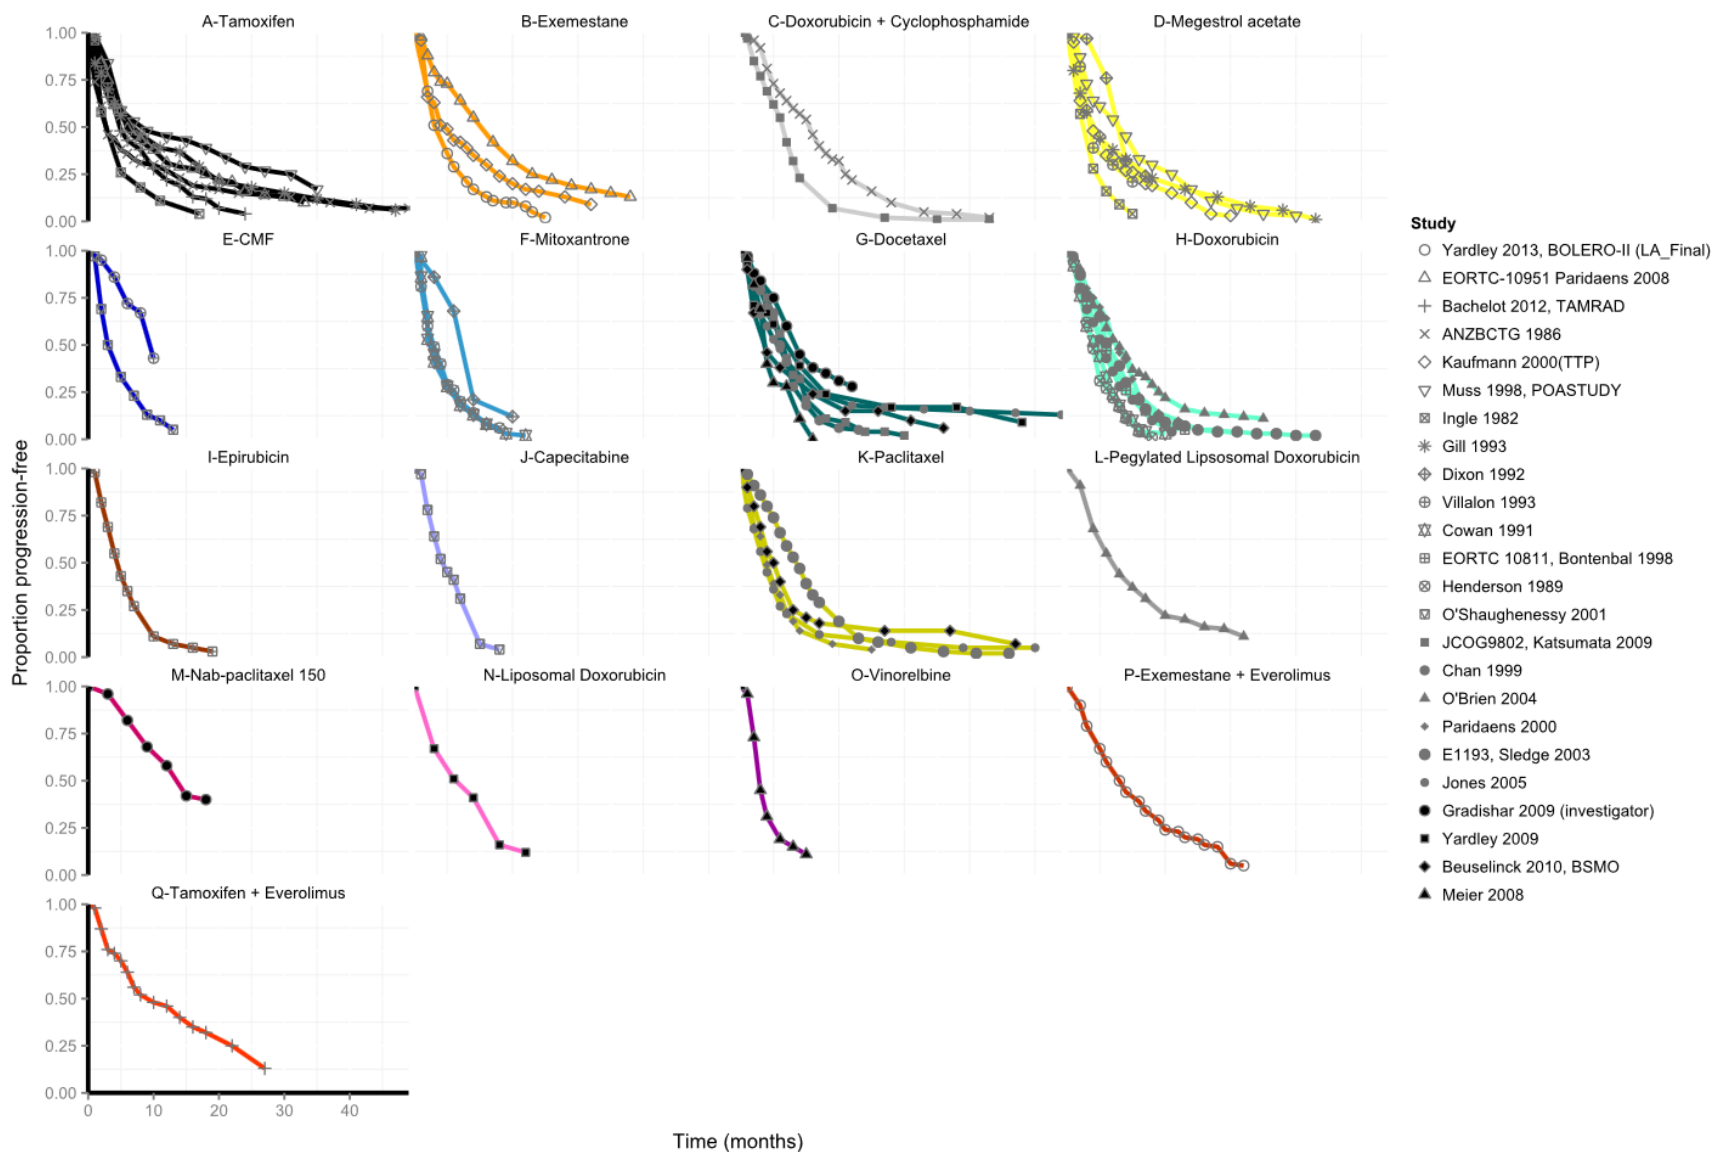

Supplement: MOESM7 [file 9598962]
